# Supplementary material
Source: MDPI journal article supplement (https://www.mdpi.com/2072-4292/11/19/2201)
Supplement: s1 [file s1]

## Supplementary Materials

**Table S1.** List of PhenoCam sites used in this study, including the site name, camera name, location, latitude and longitude of each camera. The table is arranged in alphabetical order according to camera name.

| Site name (camera name)                                                              | Location                            | Latitude (°) | Longitude (°) | Land cover |
|--------------------------------------------------------------------------------------|-------------------------------------|--------------|---------------|------------|
| Arbutus Lake ( <i>arbutuslake</i> )                                                  | Huntington Forest, New York         | 43.9821      | -74.2332      | DB         |
| Ashburnham State Forest ( <i>ashburnham</i> )                                        | Ashburnham, Massachusetts           | 42.6029      | -71.9260      | DB         |
| Bartlett Experimental Forest ( <i>bartlett</i> )                                     | Bartlett, New Hampshire             | 44.0646      | -71.2881      | DB         |
| Bartlett Experimental Forest ( <i>bartlettir</i> )                                   | Bartlett, New Hampshire             | 44.0646      | -71.2881      | DB         |
| Boston Common ( <i>bostoncommon</i> )                                                | Boston, Massachusetts               | 42.3559      | -71.0641      | DB         |
| Boston University ( <i>bostonu</i> )                                                 | Boston, Massachusetts               | 42.3504      | -71.1044      | DB         |
| Boundary Waters Canoe Area Wilderness ( <i>boundarywaters</i> )                      | Superior National Forest, Minnesota | 47.9467      | -91.4955      | DB         |
| Cary Institute of Ecosystem Studies ( <i>caryinstitute</i> )                         | Millbrook, New York                 | 41.7839      | -73.7341      | DB         |
| Cedar Creek Ecosystem Science Reserve ( <i>cedarcreek</i> )                          | East Bethel, Minnesota              | 45.4019      | -93.2042      | DB         |
| Downer Woods Natural Area ( <i>downerwoods</i> )                                     | Milwaukee, Wisconsin                | 43.0794      | -87.8808      | DB         |
| Groundhog ( <i>groundhog</i> )                                                       | Ontario, Canada                     | 48.2174      | -82.1555      | EN         |
| Harvard Forest EMS Tower ( <i>harvard</i> )                                          | Petersham, Massachusetts            | 42.5378      | -72.1715      | DB         |
| Harvard Forest Barn Tower, Camera 1 ( <i>harvardbarn</i> )                           | Petersham, Massachusetts            | 42.5353      | -72.1899      | EN         |
| Harvard Forest Barn Tower, Camera 2 ( <i>harvardbarn2</i> )                          | Petersham, Massachusetts            | 42.5353      | -72.1899      | DB         |
| Harvard Forest Hemlock Tower ( <i>harvardhemlock</i> )                               | Petersham, Massachusetts            | 42.5390      | -72.1800      | EN         |
| Harvard Forest LPH Tower ( <i>harvardlph</i> )                                       | Petersham, Massachusetts            | 42.5420      | -72.1850      | DB         |
| Hubbard Brook Experimental Forest Headquarters ( <i>hubbardbrook</i> )               | North Woodstock, New Hampshire      | 43.9438      | -71.7010      | DB         |
| Hubbard Brook Experimental Forest North Facing Watershed ( <i>hubbardbrooknfw</i> )  | Thornton, New Hampshire             | 43.9580      | -71.7762      | DB         |
| Hubbard Brook Experimental Forest South Facing Watershed ( <i>hubbardbrooksfws</i> ) | Thornton, New Hampshire             | 43.9269      | -71.7407      | DB         |

|                                                                                         |                                   |         |          |    |
|-----------------------------------------------------------------------------------------|-----------------------------------|---------|----------|----|
| Kellogg Biological Station<br>(kelloggcorn)                                             | Michigan                          | 42.4375 | -85.3225 | AG |
| Station de biologie des Laurentides<br>(laurentides)                                    | Quebec, Canada                    | 45.9881 | -74.0055 | DB |
| North Attleboro High School<br>(northattleboroma)                                       | North Attleboro,<br>Massachusetts | 41.9837 | -71.3106 | DB |
| Curtis Walter-Berger Cropland<br>Flux Tower (nwohiocrop)                                | Ohio                              | 41.6285 | -83.3471 | AG |
| Proctor Maple Research Center<br>(proctor)                                              | Underhill, Vermont                | 44.5250 | -72.8660 | DB |
| Queens Biological Station (queens)                                                      | Ontario, Canada                   | 44.5650 | -76.3240 | DB |
| Austin Prep School Reading<br>(readingma)                                               | Reading, Massachusetts            | 42.5304 | -71.1272 | DB |
| Rosemount Agricultural<br>Experiment Station (rosemount)                                | Rosemount, Minnesota              | 44.7143 | -93.0898 | AG |
| Susquehanna Shale Hills Critical<br>Zone Observatory (shalehillsczo)                    | Pennsylvania                      | 40.6500 | -77.9000 | DB |
| Hay-Snake State Wildlife<br>Management Area (snakerivermn)                              | Woodland, Minnesota               | 46.1206 | -93.2447 | DB |
| Academy Hill School Springfield<br>(springfieldma)                                      | Springfield,<br>Massachusetts     | 42.1352 | -72.5860 | DB |
| Thompson Farm Observatory<br>(thompsonfarm2N)                                           | Durham, New<br>Hampshire          | 43.1086 | -70.9505 | DB |
| Turkey Point Carbon Cycle<br>Research Project Mature<br>Deciduous Site (turkeypointdbf) | Ontario, Canada                   | 42.6353 | -80.5576 | DB |
| Turkey Point Carbon Cycle<br>Research Project 2002 White Pine<br>(turkeypointenf02)     | Ontario, Canada                   | 42.6609 | -80.5595 | EN |
| Turkey Point Carbon Cycle<br>Research Project 1939 White Pine<br>(turkeypointenf39)     | Ontario, Canada                   | 42.7098 | -80.3574 | EN |
| Turkey Point Carbon Cycle<br>Research Project 1974 White Pine<br>(turkeypointenf74)     | Ontario, Canada                   | 42.7068 | -80.3483 | EN |
| University of Illinois Energy Farm<br>maize/soybean agrosystem<br>(uiefmaize)           | Urbana, Illinois                  | 40.0628 | -88.1961 | AG |
| University of Illinois Energy Farm<br>miscanthus agrosystem<br>(uiefmiscanthus)         | Urbana, Illinois                  | 40.0628 | -88.1984 | GR |
| University of Illinois Energy Farm<br>restored prairie (uiefprairie)                    | Urbana, Illinois                  | 40.0637 | -88.1973 | GR |
| University of Illinois Energy Farm<br>switchgrass agrosystem<br>(uiefswitchgrass)       | Urbana, Illinois                  | 40.0637 | -88.1973 | GR |

|                                                                       |                                                |         |          |    |
|-----------------------------------------------------------------------|------------------------------------------------|---------|----------|----|
| University of Michigan Biological Station ( <i>umichbiological</i> )  | near Pellston, Michigan                        | 45.5598 | -84.7138 | DB |
| University of Michigan Biological Station ( <i>umichbiological2</i> ) | near Pellston, Michigan                        | 45.5625 | -84.6976 | DB |
| University of Wisconsin Madison Field Station ( <i>uwmfieldsta</i> )  | Saukville, Wisconsin                           | 43.3871 | -88.0229 | DB |
| Willow Creek ( <i>willowcreek</i> )                                   | Chequamegon-Nicolet National Forest, Wisconsin | 45.8060 | -90.0791 | DB |
| Woods Hole Research Center ( <i>woodshole</i> )                       | Falmouth, Massachusetts                        | 41.5495 | -70.6432 | DB |
| Worcester State University ( <i>worcester</i> )                       | Worcester, Massachusetts                       | 42.2697 | -71.8428 | DB |

**Table S2.** Statistics comparing phenological transition dates extracted from TIMESAT (double logistic and Savitzky-Golay) with those obtained from the MODIS MLCD C5 product across all years and for the four MODIS tiles used in this analysis. Bias is calculated relative to MLCD, where a negative bias indicates that MLCD dates are later than TIMESAT dates. All correlation coefficient values listed in this table are statistically significant at  $p < 0.05$ . We used two thresholds corresponding to 10% and 15% of the maximum seasonal amplitude of EVI in spring and fall.

| Tile                  | Method              | R    | RMSE  | Bias | Slope | Intercept |
|-----------------------|---------------------|------|-------|------|-------|-----------|
| Start of Season (SOS) |                     |      |       |      |       |           |
| US Southwest          | Double Logistic 10% | 0.94 | 10.28 | 2    | 0.87  | 13.21     |
|                       | Double Logistic 15% | 0.97 | 8.16  | 8    | 0.88  | 18.89     |
|                       | Savitzky-Golay 10%  | 0.82 | 17.26 | -9   | 0.72  | 16.77     |
|                       | Savitzky-Golay 15%  | 0.85 | 16.06 | -1   | 0.77  | 20.83     |
| US Midwest            | Double Logistic 10% | 0.91 | 7.59  | -2   | 0.95  | 3.03      |
|                       | Double Logistic 15% | 0.89 | 8.09  | 4    | 0.95  | 9.18      |
|                       | Savitzky-Golay 10%  | 0.74 | 12.93 | -15  | 0.84  | 2.71      |
|                       | Savitzky-Golay 15%  | 0.80 | 11.67 | -5   | 0.94  | 1.86      |
| US Northeast          | Double Logistic 10% | 0.87 | 7.36  | -2   | 0.83  | 16.69     |
|                       | Double Logistic 15% | 0.88 | 6.57  | 3    | 0.82  | 23.57     |
|                       | Savitzky-Golay 10%  | 0.51 | 12.38 | -10  | 0.49  | 47.99     |
|                       | Savitzky-Golay 15%  | 0.63 | 11.16 | -3   | 0.59  | 43.11     |
| Central Canada        | Double Logistic 10% | 0.25 | 17.98 | -16  | 0.62  | 34.50     |
|                       | Double Logistic 15% | 0.28 | 16.41 | -9   | 0.64  | 39.70     |
|                       | Savitzky-Golay 10%  | 0.62 | 8.38  | -26  | 0.94  | -17.82    |
|                       | Savitzky-Golay 15%  | 0.61 | 8.91  | -20  | 1.01  | -21.76    |
| End of Season (EOS)   |                     |      |       |      |       |           |
| US Southwest          | Double Logistic 10% | 0.76 | 16.02 | 9    | 0.71  | 100.01    |
|                       | Double Logistic 15% | 0.77 | 14.33 | 0    | 0.65  | 107.71    |
|                       | Savitzky-Golay 10%  | 0.39 | 21.68 | 18   | 0.34  | 221.69    |
|                       | Savitzky-Golay 15%  | 0.48 | 15.80 | 9    | 0.33  | 216.94    |
| US Midwest            | Double Logistic 10% | 0.76 | 13.54 | 16   | 0.96  | 27.11     |
|                       | Double Logistic 15% | 0.80 | 11.35 | 7    | 0.96  | 18.56     |
|                       | Savitzky-Golay 10%  | 0.46 | 25.39 | 29   | 0.82  | 78.67     |
|                       | Savitzky-Golay 15%  | 0.70 | 15.86 | 19   | 0.99  | 21.63     |
| US Northeast          | Double Logistic 10% | 0.57 | 18.95 | 13   | 0.98  | 17.74     |
|                       | Double Logistic 15% | 0.81 | 8.95  | 7    | 0.89  | 38.72     |
|                       | Savitzky-Golay 10%  | 0.12 | 28.24 | 21   | 0.24  | 245.68    |
|                       | Savitzky-Golay 15%  | 0.41 | 16.47 | 12   | 0.54  | 147.22    |
| Central Canada        | Double Logistic 10% | 0.14 | 26.04 | 18   | 0.55  | 139.44    |
|                       | Double Logistic 15% | 0.21 | 17.97 | 12   | 0.57  | 126.30    |
|                       | Savitzky-Golay 10%  | 0.46 | 11.11 | 43   | 0.89  | 72.59     |
|                       | Savitzky-Golay 15%  | 0.41 | 12.09 | 35   | 0.88  | 66.78     |

**Table S3.** Statistics comparing phenological transition dates extracted from TIMESAT (double logistic and Savitzky-Golay) with those obtained from the MODIS MLCD C6 product across all years and for the four MODIS tiles used in this analysis. Bias is calculated relative to MLCD, where a negative bias indicates that MLCD dates are later than TIMESAT dates. All correlation coefficient values listed in this table are statistically significant at  $p < 0.05$ . We used two thresholds corresponding to 10% and 15% of the maximum seasonal amplitude of EVI in spring and fall.

| Tile                  | Method              | R    | RMSE  | Bias | Slope | Intercept |
|-----------------------|---------------------|------|-------|------|-------|-----------|
| Start of Season (SOS) |                     |      |       |      |       |           |
| US Southwest          | Double Logistic 10% | 0.95 | 9.68  | 0    | 1.00  | -1.04     |
|                       | Double Logistic 15% | 0.95 | 10.36 | 6    | 0.99  | 5.96      |
|                       | Savitzky-Golay 10%  | 0.96 | 8.35  | -3   | 1.00  | -3.46     |
|                       | Savitzky-Golay 15%  | 0.97 | 7.86  | 4    | 1.00  | 4.24      |
| US Midwest            | Double Logistic 10% | 0.88 | 8.16  | 1    | 0.91  | 12.19     |
|                       | Double Logistic 15% | 0.90 | 6.73  | 8    | 0.86  | 25.46     |
|                       | Savitzky-Golay 10%  | 0.85 | 9.64  | -7   | 0.96  | -2.13     |
|                       | Savitzky-Golay 15%  | 0.93 | 6.33  | 2    | 0.99  | 1.89      |
| US Northeast          | Double Logistic 10% | 0.81 | 7.80  | 3    | 0.84  | 21.45     |
|                       | Double Logistic 15% | 0.81 | 7.53  | 9    | 0.83  | 27.56     |
|                       | Savitzky-Golay 10%  | 0.72 | 10.22 | -7   | 0.84  | 10.71     |
|                       | Savitzky-Golay 15%  | 0.81 | 8.10  | 2    | 0.86  | 16.71     |
| Central Canada        | Double Logistic 10% | 0.47 | 12.21 | 2    | 0.68  | 40.12     |
|                       | Double Logistic 15% | 0.41 | 11.43 | 9    | 0.55  | 64.08     |
|                       | Savitzky-Golay 10%  | 0.55 | 12.59 | -3   | 0.85  | 13.91     |
|                       | Savitzky-Golay 15%  | 0.70 | 8.67  | 2    | 0.90  | 13.52     |
| End of Season (EOS)   |                     |      |       |      |       |           |
| US Southwest          | Double Logistic 10% | 0.63 | 20.52 | 15   | 1.00  | 13.65     |
|                       | Double Logistic 15% | 0.69 | 16.10 | 8    | 0.96  | 20.10     |
|                       | Savitzky-Golay 10%  | 0.66 | 17.91 | 16   | 0.92  | 40.58     |
|                       | Savitzky-Golay 15%  | 0.72 | 15.00 | 8    | 0.97  | 16.65     |
| US Midwest            | Double Logistic 10% | 0.85 | 9.65  | 8    | 0.92  | 31.11     |
|                       | Double Logistic 15% | 0.86 | 8.92  | 0    | 0.91  | 25.99     |
|                       | Savitzky-Golay 10%  | 0.86 | 8.87  | 14   | 0.91  | 38.72     |
|                       | Savitzky-Golay 15%  | 0.90 | 7.60  | 5    | 0.96  | 17.12     |
| US Northeast          | Double Logistic 10% | 0.49 | 15.99 | 8    | 0.73  | 91.49     |
|                       | Double Logistic 15% | 0.77 | 9.09  | 2    | 0.85  | 46.93     |
|                       | Savitzky-Golay 10%  | 0.68 | 13.08 | 12   | 0.97  | 20.64     |
|                       | Savitzky-Golay 15%  | 0.92 | 5.80  | 5    | 1.07  | -17.91    |
| Central Canada        | Double Logistic 10% | 0.34 | 9.48  | 1    | 0.28  | 215.91    |
|                       | Double Logistic 15% | 0.31 | 11.28 | -7   | 0.32  | 195.94    |
|                       | Savitzky-Golay 10%  | 0.62 | 13.41 | 6    | 0.88  | 42.57     |
|                       | Savitzky-Golay 15%  | 0.85 | 7.74  | 2    | 1.02  | -3.57     |

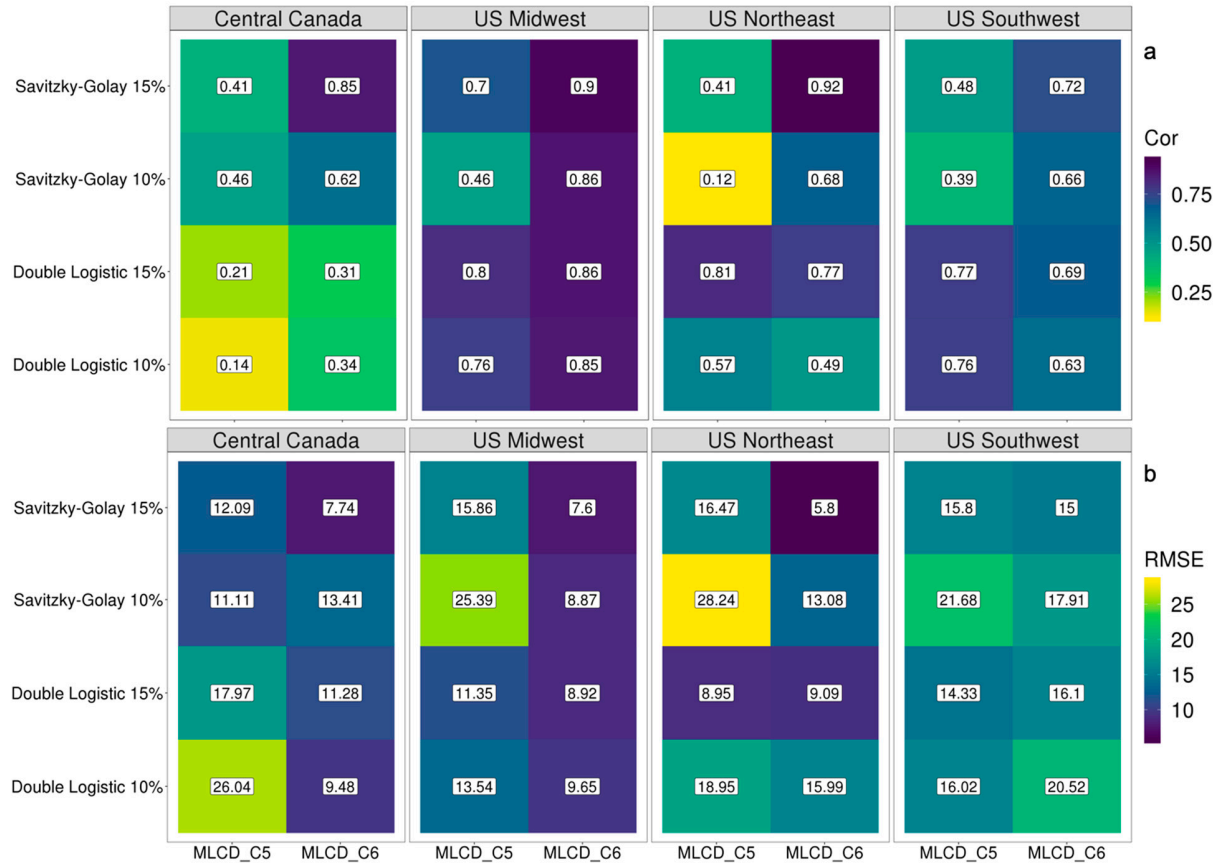

**Figure S1.** Summary statistics comparing phenological transition dates extracted from TIMESAT with those obtained from the MODIS C5 and C6 MLCD products across 12 years from 2003 to 2014 for four MODIS tiles in Central Canada, US Midwest, US Northeast and US Southwest. Panel (a) shows the correlation and panel (b) shows the root mean square error (RMSE) in days for end of season (EOS). We used two thresholds corresponding to 10% and 15% of the seasonal amplitude of EVI in spring and fall. All correlation values are statistically significant at  $p < 0.05$ .

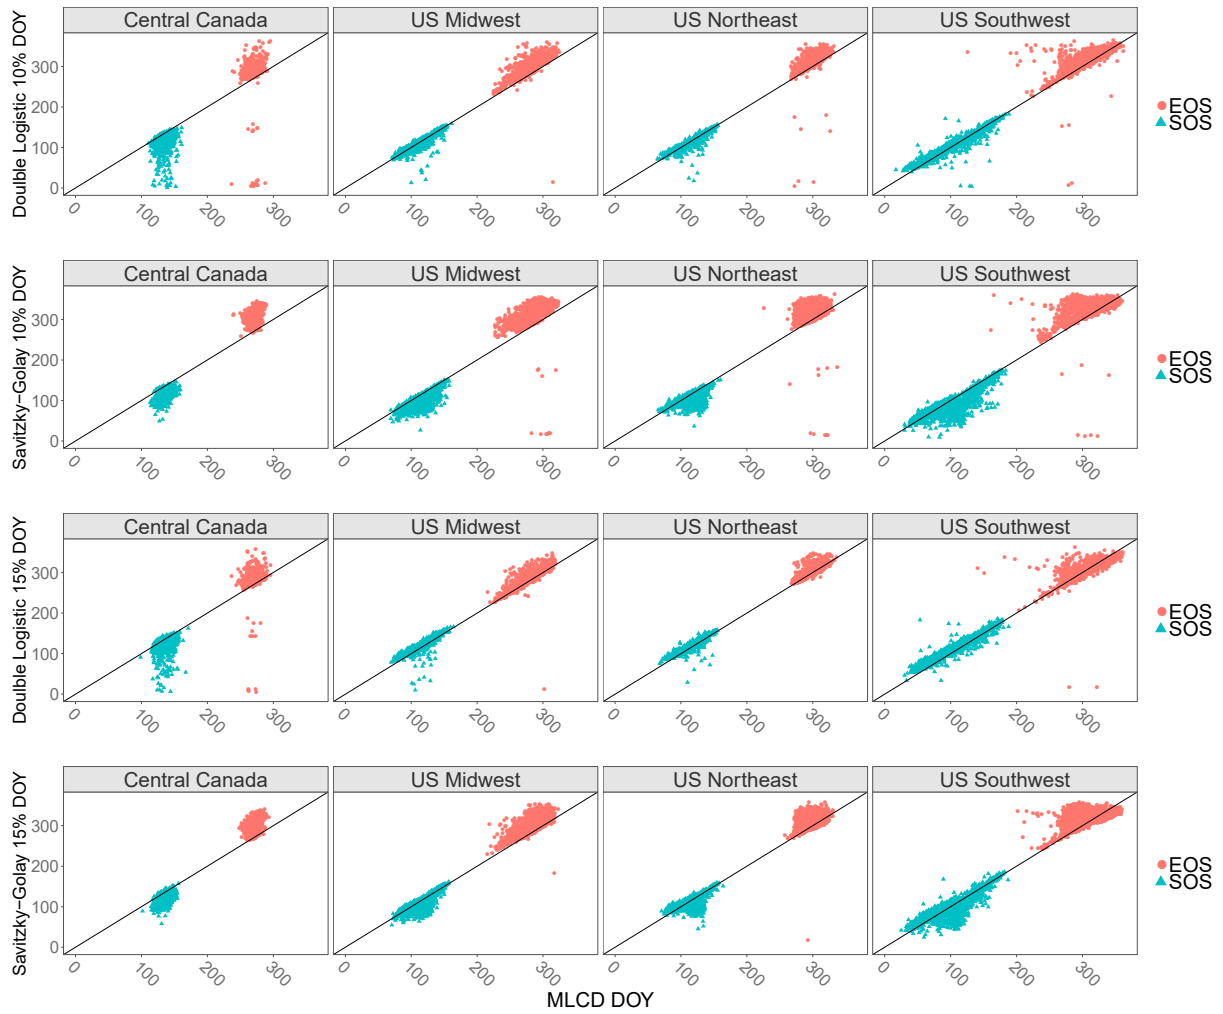

**Figure S2.** Scatterplots showing agreement among the MODIS MLCD C5 product and the different TIMESAT approaches stratified by season: start of season (SOS) is shown in blue and end of season (EOS) is shown in red. The panels represent the different regions of North America included in this study. Data shown in this plot were screened for snow using normalized difference snow index (NDSI).

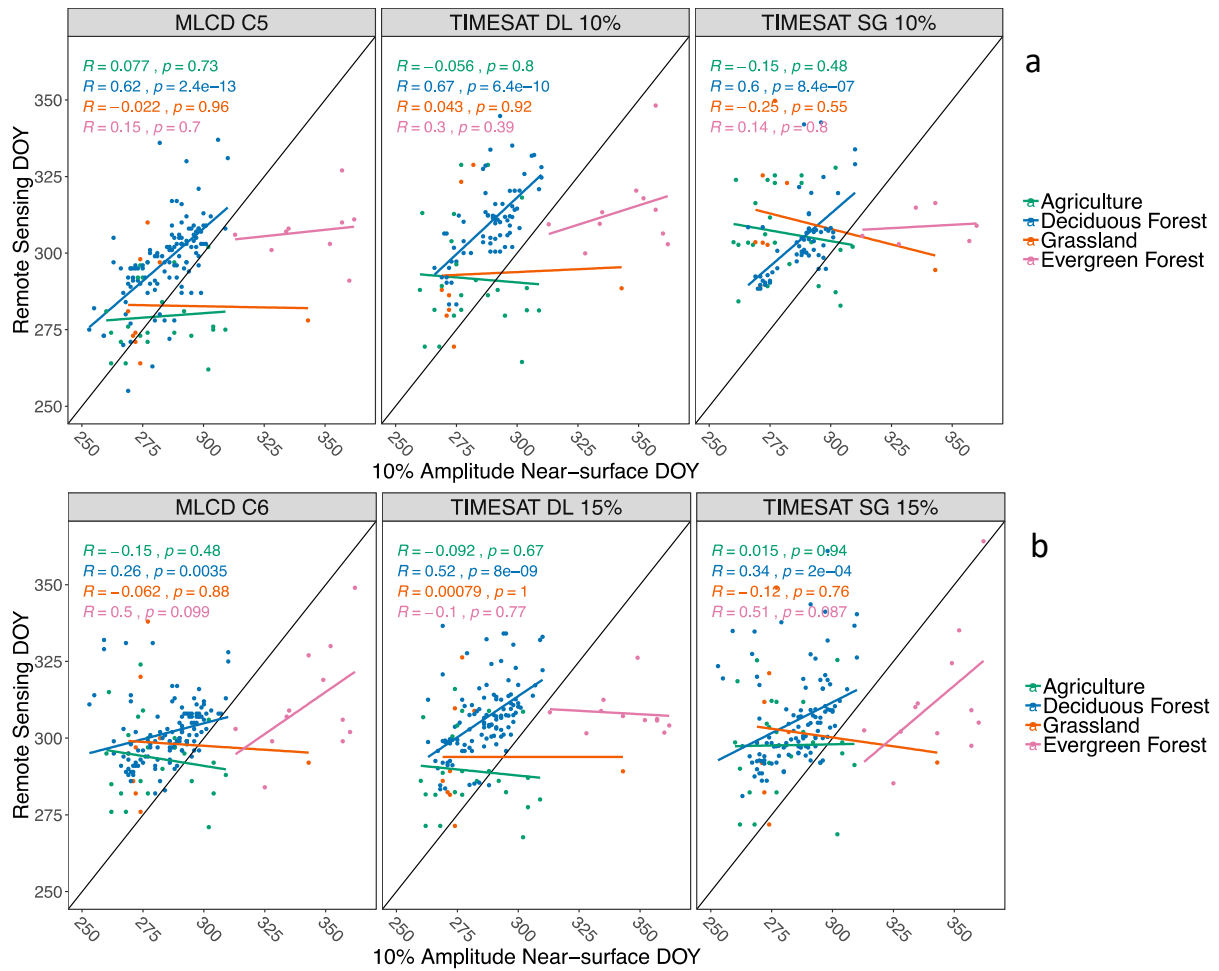

**Figure S3.** Relationships between PhenoCam and MODIS end of season (EOS) day of year (DOY). Top row (a) shows a comparison of PhenoCam dates against C5 MLCD dates, TIMESAT double logistic (DL), and TIMESAT Savitzky-Golay (SG) results, respectively. Bottom row (b) shows comparison of Phenocam dates with MLCD C6 dates, and TIMESAT results. Solid black lines show 1:1 relationship and solid colored lines show best fit regression models for the four different land cover classes in the field of view of the cameras.



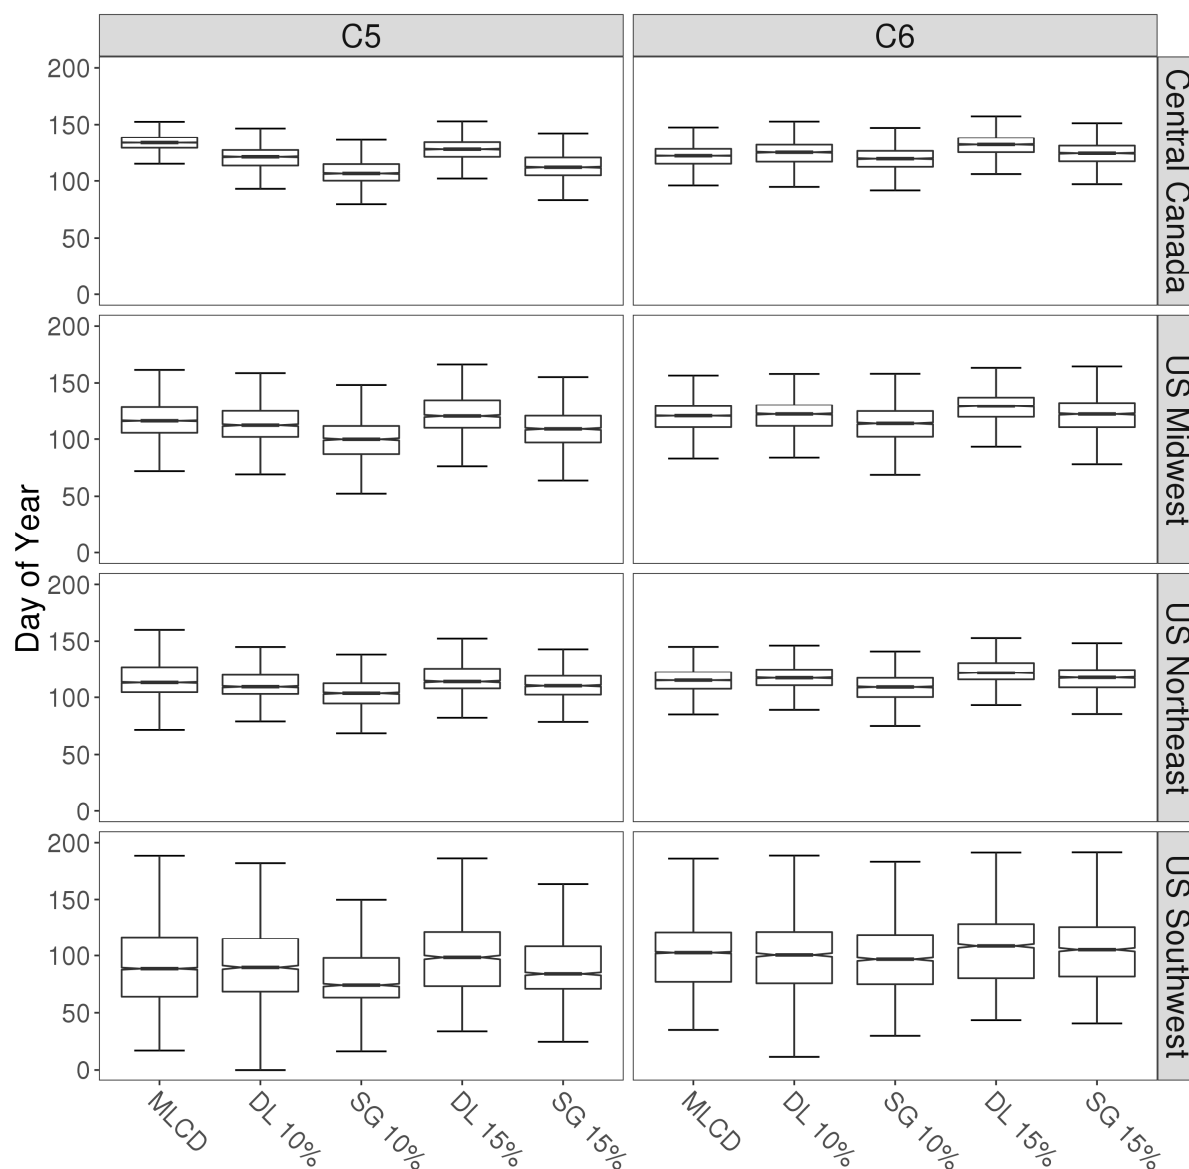

**Figure S4.** Comparison among median phenological transition dates retrieved from MLCD, TIMESAT double logistic (DL) at 10% and 15% of amplitude, and TIMESAT Savitzky-Golay (SG) at 10% and 15% of amplitude for the time period between 2003 and 2014. The results show the timing of SOS across four different MODIS tiles in North America and for two different MODIS Collections: C5 and C6.

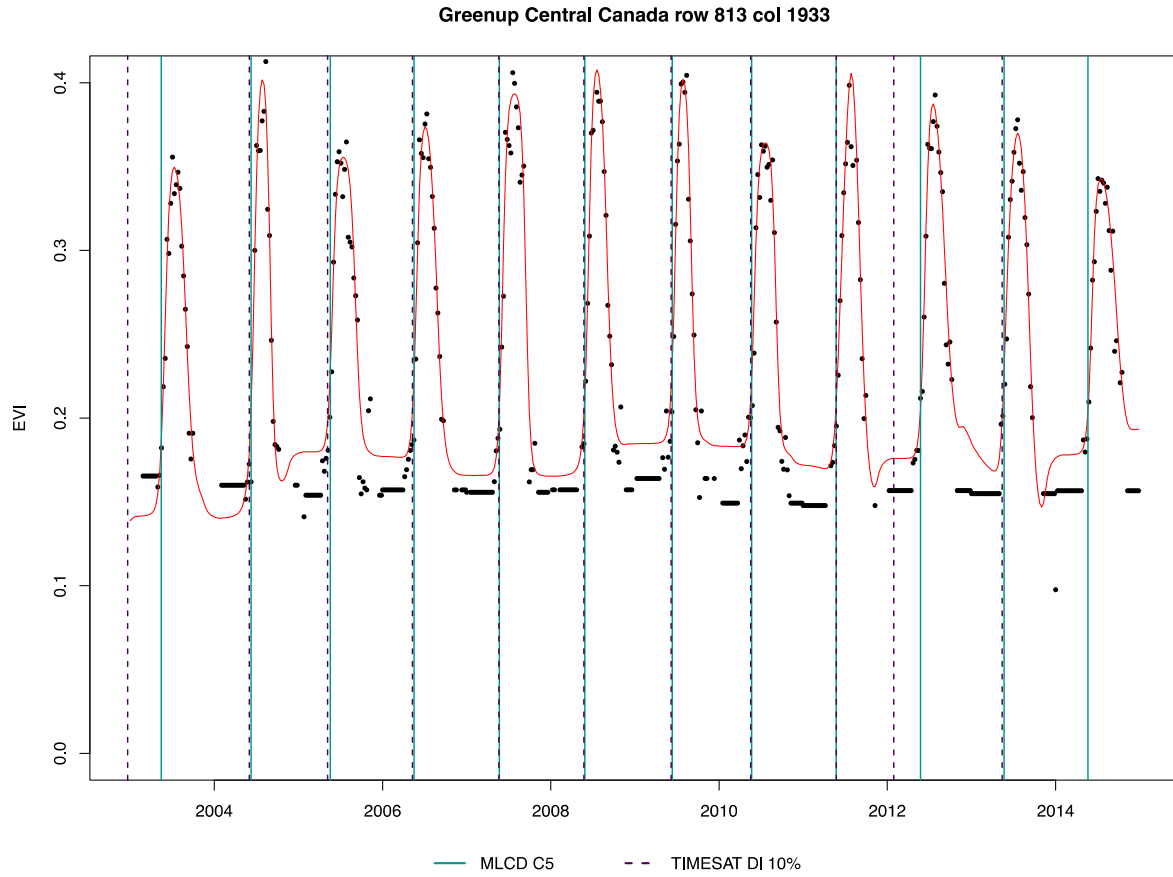

**Figure S5.** EVI time series for a pixel in Central Canada from 2003 to 2014. The black dots show the EVI observations (screened for snow and gap filled) and the red line shows the TIMESAT double logistic fit. The blue solid line shows the C5 MLCD start of season (SOS) while the purple dashed line shows the TIMESAT SOS based on double logistic at 10% of amplitude.
